# Supplementary material
Source: HighWire-hosted journal article supplement (https://jnm.snmjournals.org/highwire/filestream/94732/field_highwire_adjunct_files/0/152249_Supplemental_Data.pdf)
Supplement: 152249_Supplemental_Data.pdf [file 152249_Supplemental_Data.pdf]

**Supplemental Table 1.**

| <b>Development of Educational Content Including Webinars</b> |                                             |                                                                                                                                                                                                   |                                                                                                                 |                            |                                |                                                                                                                                                                            |                                                          |
|--------------------------------------------------------------|---------------------------------------------|---------------------------------------------------------------------------------------------------------------------------------------------------------------------------------------------------|-----------------------------------------------------------------------------------------------------------------|----------------------------|--------------------------------|----------------------------------------------------------------------------------------------------------------------------------------------------------------------------|----------------------------------------------------------|
| <u>Name</u>                                                  | Type of educational content                 | <u>web link (if any)</u>                                                                                                                                                                          | <u>brief description</u>                                                                                        | <u>Free (Y/N)</u>          | <u>Cost (Euros/US Dollars)</u> | <u>Advantages</u>                                                                                                                                                          | <u>Limitations</u>                                       |
| <b>IAEA Radiation Protection in Paediatric Radiology</b>     | IAEA book (publication)                     | <a href="http://www-pub.iaea.org/books/IAEABooks/8727/Radiation-Protection-in-Paediatric-Radiology">http://www-pub.iaea.org/books/IAEABooks/8727/Radiation-Protection-in-Paediatric-Radiology</a> | Recent 2012 IAEA publication on radiation protection in Paediatric Radiology.                                   | Y (the online pdf version) |                                | Recent                                                                                                                                                                     | Only one small chapter in Nuc Med applications           |
| <b>IAEA Radiation Protection of Patients (RPOP)</b>          | Web base information and educational portal | <a href="https://rpop.iaea.org/RPOP/RPoP/Content/index.htm">https://rpop.iaea.org/RPOP/RPoP/Content/index.htm</a>                                                                                 | IAEA internet portal dedicated to radiation protection of patients.                                             | Y                          |                                | Fairly extensive information. One page dedicated to radiation protection for children in radiology. The slide presentations are available in English, Spanish and Russian. | No specific information about Pediatric Nuclear Medicine |
| <b>Image gently</b>                                          | Web base information and educational portal | <a href="http://www.imagegently.org">http://www.imagegently.org</a><br><a href="http://www.pedrad.org/associations/5364/ig/">http://www.pedrad.org/associations/5364/ig/</a>                      | Coalition of health care organizations dedicated to providing safe, high quality pediatric imaging.             | Y                          |                                | Extensive, professional, specific information about Pediatric Nuclear Medicine                                                                                             | Basically only in English                                |
| <b>The Society for Pediatric Radiology</b>                   | Web base information and educational portal | <a href="http://www.pedrad.org/">http://www.pedrad.org/</a>                                                                                                                                       | The Society for Pediatric Radiology is dedicated to fostering health care through imaging and image-guided care | Y                          |                                | Full page dedicated to safety on Pediatric imaging in general                                                                                                              | No specifics about pediatric Nuclear Medicine            |

|                                                                        |                                                            |                                                                                                                                                                         |                                                                                                                                                                           |   |  |                                                                                                                                                                                               |                                                                                     |
|------------------------------------------------------------------------|------------------------------------------------------------|-------------------------------------------------------------------------------------------------------------------------------------------------------------------------|---------------------------------------------------------------------------------------------------------------------------------------------------------------------------|---|--|-----------------------------------------------------------------------------------------------------------------------------------------------------------------------------------------------|-------------------------------------------------------------------------------------|
| <b>RadiologyInfo.org</b>                                               | Web base information and educational portal for patients   | <a href="http://www.eanm.org/publications/guidelines/art10.1007_s00259-014-2731-9.pdf">http://www.eanm.org/publications/guidelines/art10.1007_s00259-014-2731-9.pdf</a> | Patient oriented RSNA and ACR developed information web page on Imaging                                                                                                   | Y |  | Fairly comprehensive professional patient oriented web portal. Section dedicated to children's imaging, including nuclear medicine, and explanatory videos. Available in English and Spanish. | Videos only in English                                                              |
| <b>Health Physics Society</b>                                          | Web base information and educational portal                | <a href="http://hps.org/">http://hps.org/</a>                                                                                                                           | Radiation safety information for the professional and non-professional organizations, including public, patients and media.                                               | Y |  | Ask a questions section. Whole page dedicated to nuclear medicine and the pregnant patient.                                                                                                   | Only English and no dedicated page to pediatric Nuclear medicine dose optimization. |
| <b>SNMMI Dose Optimization web portal</b>                              | Information and educational portal about dose optimization | <a href="http://www.snmmi.org/dose">http://www.snmmi.org/dose</a>                                                                                                       | professional information and education web portal about dose optimization in imaging and particularly in Nuclear Medicine                                                 | Y |  | Comprehensive                                                                                                                                                                                 | Not exclusively dedicated to pediatric nuclear medicine. Only English.              |
| <b>SNMMI Pediatric Activity Calculator</b>                             | Web-based pediatric activity calculator                    | <a href="http://www.snmmi.org/pedactivitytool">http://www.snmmi.org/pedactivitytool</a>                                                                                 | For a particular procedure, this tool calculates the recommended administered activity according to 2014 North American Guidelines and EANM pediatric dose card           | Y |  | Consistent with 2014 harmonized North American and EANM pediatric guidelines                                                                                                                  | Only English.                                                                       |
| <b>SNMMI Dose Calculator</b>                                           | Web-based dose calculator                                  | <a href="http://www.snmmi.org/dosetool">http://www.snmmi.org/dosetool</a>                                                                                               | For a particular procedure, this tool calculates the effective and critical organ doses for a variety of standard phantoms including adults, children and pregnant women. | Y |  | Generally based on ICRP 53, 80, 106 dose models.                                                                                                                                              | Not exclusively dedicated to pediatric nuclear medicine. Only English.              |
| <b>SNMMI What you should know about Radiation and Nuclear Medicine</b> | Web base Slide presentation                                | <a href="http://www.snmmi.org/AboutSNMMI/Content.aspx?ItemNumber=955">http://www.snmmi.org/AboutSNMMI/Content.aspx?ItemNumber=955</a>                                   | Slide presentation about radiation and Nuclear Medicine                                                                                                                   | Y |  | Very clear information for the general public                                                                                                                                                 | Only English                                                                        |

|                                                                                                                                             |                                                         |                                                                                                                                                                                                                         |                                                                                                        |   |  |                                                        |                                     |
|---------------------------------------------------------------------------------------------------------------------------------------------|---------------------------------------------------------|-------------------------------------------------------------------------------------------------------------------------------------------------------------------------------------------------------------------------|--------------------------------------------------------------------------------------------------------|---|--|--------------------------------------------------------|-------------------------------------|
| <b>SNMMI press release on safe/beneficial medical uses of radiation</b>                                                                     | web page                                                | <a href="http://www.snmmi.org/ClinicalPractice/content.aspx?ItemNumber=4825">http://www.snmmi.org/ClinicalPractice/content.aspx?ItemNumber=4825</a>                                                                     | Information web page on safe use of medical radiation                                                  | Y |  | Clear and for the general public                       | Only English                        |
| <b>SNMMI statement on dose optimization</b>                                                                                                 | Position statement                                      | <a href="http://snmmi.files.cms-plus.com/docs/SNM_Position_Statement_on_Dose_Optimization_FINAL_June_2012.pdf">http://snmmi.files.cms-plus.com/docs/SNM_Position_Statement_on_Dose_Optimization_FINAL_June_2012.pdf</a> | Position statement on dose optimization                                                                | Y |  | Recent, brief and to the point                         | Only English                        |
| <b>North American Consensus Guidelines for Administered Radiopharmaceutical Activities in Children and Adolescents (JNM, February 2011)</b> | Guideline-paper                                         | <a href="http://interactive.snm.org/docs/Pediatric_dose_guidelines_JNM_2011_52_318.pdf">http://interactive.snm.org/docs/Pediatric_dose_guidelines_JNM_2011_52_318.pdf</a>                                               | 2010 North American pediatric guideline for radiopharmaceutical activities in children and adolescents | Y |  | Recent                                                 | Only English                        |
| <b>International Guidelines for Pediatric Radiopharmaceutical Administered Activities.</b>                                                  | Guideline-editorial in J Nucl Med 2014                  | <a href="http://jnm.snmjournals.org/content/55/6/869.long">http://jnm.snmjournals.org/content/55/6/869.long</a>                                                                                                         | Editorial on the 2014 harmonized guidelines on pediatric administered activities                       | Y |  | Recent                                                 | Only English                        |
| <b>The 2007 EANM pediatric dosage card: additional notes with respect to F-18</b>                                                           | Commentary/erratum on the EANM 2007 pediatric dose card | <a href="http://rd.springer.com/content/pdf/10.1007%2Fs00259-008-0799-9.pdf">http://rd.springer.com/content/pdf/10.1007%2Fs00259-008-0799-9.pdf</a>                                                                     | Additional notes with respect to 18Fluoride dosages in the 2007 EANM dose card                         | Y |  | 2007 version                                           | Only English                        |
| <b>The 2007 EANM pediatric dosage card</b>                                                                                                  | Guideline-paper                                         | <a href="http://rd.springer.com/content/pdf/10.1007%2Fs00259-007-0370-0.pdf">http://rd.springer.com/content/pdf/10.1007%2Fs00259-007-0370-0.pdf</a>                                                                     | EANM 2007 pediatric dosage card                                                                        | Y |  | Long list of procedures. Elaborated in cardiac imaging | Only English, and being 6 years old |
| <b>Harmonized Paediatric Guidelines: 2014 EANM dosage card</b>                                                                              | Guideline-paper                                         | <a href="http://rd.springer.com/article/10.1007%2Fs00259-014-2731-9">http://rd.springer.com/article/10.1007%2Fs00259-014-2731-9</a>                                                                                     | 2014 harmonized guidelines on pediatric administered activities                                        | Y |  | New                                                    | Only English                        |

|                                                                                                     |                                                                                                                                   |                                                                                                                                                                                 |                                                                                                                                                                                     |   |  |                                                         |                                                               |
|-----------------------------------------------------------------------------------------------------|-----------------------------------------------------------------------------------------------------------------------------------|---------------------------------------------------------------------------------------------------------------------------------------------------------------------------------|-------------------------------------------------------------------------------------------------------------------------------------------------------------------------------------|---|--|---------------------------------------------------------|---------------------------------------------------------------|
| <b>Minimizing and Communicating Radiation Risk in Pediatric Nuclear Medicine (JNM, August 2011)</b> | paper on communicating radiation risk                                                                                             | <a href="http://jnm.snmjournals.org/content/52/8/1240.full.pdf+html">http://jnm.snmjournals.org/content/52/8/1240.full.pdf+html</a>                                             | Very handy paper on radiation safety in pediatrics                                                                                                                                  | Y |  | Rarely published topic very well presented              | Only English                                                  |
| <b>Fact Sheet: Molecular Imaging Safety</b>                                                         | Fact sheet                                                                                                                        | <a href="http://snmmi.files.cms-plus.com/FileDownloads/DiscoverMI/FactSheets/MISafety.pdf">http://snmmi.files.cms-plus.com/FileDownloads/DiscoverMI/FactSheets/MISafety.pdf</a> | Fact sheet on radiation safety and radiation dosages, mainly for nonmedical personnel                                                                                               | Y |  | Easy to read                                            | Only English                                                  |
| <b>Peddose.net</b>                                                                                  | Pediatric dose information, education and research web portal supported by the European Institute for Biomedical Imaging Research | <a href="http://www.peddose.net/cms/website.php?id=en/news.htm&amp;ncid=244">http://www.peddose.net/cms/website.php?id=en/news.htm&amp;ncid=244</a>                             | Fairly extensive and elaborated web portal with among other interesting features includes 11 online lectures on this topic of pediatric dosing (from a Peddose presymposium course) | Y |  | Extensive and fully dedicated web portal; to this topic | Only English                                                  |
| <b>Medical Procedure Radiation Dose Calculator Radiation Dose Assessment Resource website</b>       | web portal developed by a group of interested professionals that form RADAR                                                       | <a href="http://www.doseinfo-radar.com/RADARDoseRiskCalc.html">http://www.doseinfo-radar.com/RADARDoseRiskCalc.html</a>                                                         | radiation dose calculator for a large variety of medical procedures including nuclear medicine scans.                                                                               | Y |  | Free                                                    | English. Not endorsed by any mayor professional organization. |
| <b>Patient Exposure Radiation Dose Calculator from Radiation Dose Assessment Resource website</b>   | web portal sponsored by a group of interested professionals that from RADAR                                                       | <a href="http://www.doseinfo-radar.com/ExposureCalculator.html">http://www.doseinfo-radar.com/ExposureCalculator.html</a>                                                       | Patient exposure radiation dose calculator for nuclear medicine procedures                                                                                                          | Y |  | Free                                                    | English. Not endorsed by any mayor professional organization. |

|                                                                                                                        |                                               |                                                                                                                                                         |                                             |   |                     |                                                                |                                         |
|------------------------------------------------------------------------------------------------------------------------|-----------------------------------------------|---------------------------------------------------------------------------------------------------------------------------------------------------------|---------------------------------------------|---|---------------------|----------------------------------------------------------------|-----------------------------------------|
| <b>Weight-Based, Low-Dose Pediatric Whole-Body PET/CT Protocols (October 2009)</b>                                     | JNM paper                                     | <a href="http://jnm.snmjournals.org/content/50/10/1570.full.pdf+html">http://jnm.snmjournals.org/content/50/10/1570.full.pdf+html</a>                   | Comprehensive paper on the subject          | Y |                     | Comprehensive and free                                         | Only English                            |
| <b>Improved Dose Regimen in Pediatric PET (February 2010)</b>                                                          | JNM paper                                     | <a href="http://jnm.snmjournals.org/content/51/2/293.full.pdf+html">http://jnm.snmjournals.org/content/51/2/293.full.pdf+html</a>                       | Comprehensive paper on the subject          | Y |                     | Comprehensive and free                                         | Only English, and only PET, not PET/CT. |
| <b>Nuclear Medicine in the First Year of Life (June 2011)</b>                                                          | JNM paper                                     | <a href="http://jnm.snmjournals.org/content/52/6/905.full.pdf+html">http://jnm.snmjournals.org/content/52/6/905.full.pdf+html</a>                       | Comprehensive paper on the subject          | Y |                     | Comprehensive and free                                         | Only in English.                        |
| <b>Evaluation of Optimal Acquisition Duration or Injected Activity for Pediatric 18F-FDG PET/CT (July 2011)</b>        | JNM paper                                     | <a href="http://jnm.snmjournals.org/content/52/7/1028.full.pdf+html">http://jnm.snmjournals.org/content/52/7/1028.full.pdf+html</a>                     | Comprehensive paper on the subject          | Y |                     | Comprehensive and free                                         | Only English.                           |
| <b>Virtual Reality for Dose Optimization in Pediatric Nuclear Medicine: Better Than the Real Thing (December 2011)</b> | JNM editorial comment ("Invited perspective") | <a href="http://jnm.snmjournals.org/content/52/12/1845.full.pdf+html">http://jnm.snmjournals.org/content/52/12/1845.full.pdf+html</a>                   | Comprehensive paper on the subject          | Y |                     | Interesting and Free                                           | Only English                            |
| <b>Subjective Perception of Radiation Risk (December 2011 Supplement)</b>                                              | JNM paper                                     | <a href="http://jnm.snmjournals.org/content/52/Supplement_2/29S.full.pdf+html">http://jnm.snmjournals.org/content/52/Supplement_2/29S.full.pdf+html</a> | Informative paper of this interesting topic | Y |                     | Interesting and free                                           | Only English                            |
| <b>JNMT Articles on Dose Optimization</b>                                                                              | JNMT papers (total of 7)                      | <a href="http://interactive.snm.org/index.cfm?PageID=12418">http://interactive.snm.org/index.cfm?PageID=12418</a>                                       | Interesting papers on this topic            | Y |                     | One of the papers talks about low dose CT for SPECT/CT systems | Only English                            |
| <b>Applying Image Gently SM and Image Wisely SM in nuclear medicine.</b>                                               | Health Physics paper 2013                     | <a href="http://journals.lww.com/health-physics/toc/2013/02001">http://journals.lww.com/health-physics/toc/2013/02001</a>                               |                                             | N | online subscription |                                                                | Only English                            |

|                                                                                   |                                            |                                                                                                                                                                                                                                                                                                                           |                                                                                                                     |   |  |                                                |                                           |
|-----------------------------------------------------------------------------------|--------------------------------------------|---------------------------------------------------------------------------------------------------------------------------------------------------------------------------------------------------------------------------------------------------------------------------------------------------------------------------|---------------------------------------------------------------------------------------------------------------------|---|--|------------------------------------------------|-------------------------------------------|
| <b>DMSA renal scan</b>                                                            | Alasbim Journal                            | <a href="http://www.alasbimjournal.cl/alasbim/">http://www.alasbimjournal.cl/alasbim/</a>                                                                                                                                                                                                                                 |                                                                                                                     | Y |  | Spanish                                        | from 2004                                 |
| <b>Renal cystography</b>                                                          | Alasbim Journal                            | <a href="http://www.alasbimjournal.cl/alasbim/">http://www.alasbimjournal.cl/alasbim/</a>                                                                                                                                                                                                                                 |                                                                                                                     | Y |  | Spanish                                        | from 2004                                 |
| <b>Paediatric Radiopharmaceutical Administration: Harmonized Guideline (2014)</b> | EANM - SNMMI                               | <a href="http://www.eanm.org/publications/guidelines/art10.1007_s00259-014-2731-9.pdf">http://www.eanm.org/publications/guidelines/art10.1007_s00259-014-2731-9.pdf</a>                                                                                                                                                   | Recent article explaining the harmonization between the EANM pediatric dose card and the North American guidelines. | Y |  | English, Free                                  | Not truly global                          |
| <b>Japanese consensus guidelines for pediatric nuclear medicine</b>               | JSNM                                       | <a href="http://download.springer.com/static/pdf/273/art%253A10.1007%252Fs12149-014-0826-9.pdf?auth66=1398800933_f54abefb6b059d40792c252e3480ae37&amp;ext=.pdf">http://download.springer.com/static/pdf/273/art%253A10.1007%252Fs12149-014-0826-9.pdf?auth66=1398800933_f54abefb6b059d40792c252e3480ae37&amp;ext=.pdf</a> | Recent (2014) guidelines on pediatric nuclear medicine from the Japanese Society of Nuclear Medicine                | Y |  | Free, recent, version in English available     | Only in English and Japanese              |
| <b>Invited perspective - JNM</b>                                                  | Commentary on an original paper            | <a href="http://www.hopkinsmedicine.org/RTD_lab/pdf/2011_JNM_Zanconico_Virtual%20Reality%20for%20Dose%20Optimization%20in%20Pediatric%20Nuclear.pdf">http://www.hopkinsmedicine.org/RTD_lab/pdf/2011_JNM_Zanconico_Virtual%20Reality%20for%20Dose%20Optimization%20in%20Pediatric%20Nuclear.pdf</a>                       | Interesting commentary about a JNM paper                                                                            | Y |  | Free                                           | Only English                              |
| <b>Applying image Wisely and image Gently in nuclear medicine</b>                 | Slide presentation                         | <a href="http://chapter.aapm.org/nccaapm/jafari.pdf">http://chapter.aapm.org/nccaapm/jafari.pdf</a>                                                                                                                                                                                                                       | PDF file of a PowerPoint presentation on how to optimize dose reduction as done in a hospital in the USA.           | Y |  | Free                                           | Only English                              |
| <b>Pediatric Nuclear Medicine and Radiation Dose</b>                              | Article in Semin Nucl Med.2014;44: 202-209 |                                                                                                                                                                                                                                                                                                                           | Recent article on dose optimization in pediatric nuclear medicine                                                   | N |  | Well-written and concise description of issues | Only English. Only free with subscription |

**SUPPLEMENTAL TABLE 2.**

| <b>Webinars and Online Lectures</b> |                                                                                                                                         |                         |            |                          |          |           |
|-------------------------------------|-----------------------------------------------------------------------------------------------------------------------------------------|-------------------------|------------|--------------------------|----------|-----------|
| Format                              | Web link                                                                                                                                | Sponsoring organization | Free (Y/N) | Cost (Euros /US dollars) | Language | CME (Y/N) |
| online lecture                      | <a href="http://interactive.snm.org/index.cfm?PageID=4660">http://interactive.snm.org/index.cfm?PageID=4660</a>                         | SNMMI                   | N          | 20-40 US\$               | English  | Y         |
| online lecture                      | <a href="http://interactive.snm.org/index.cfm?PageID=4660">http://interactive.snm.org/index.cfm?PageID=4660</a>                         | SNMMI                   | N          | 20-40 US\$               | English  | Y         |
| online lecture                      | <a href="http://interactive.snm.org/index.cfm?PageID=4660">http://interactive.snm.org/index.cfm?PageID=4660</a>                         | SNMMI                   | N          | 20-40 US\$               | English  | Y         |
| online lecture                      | <a href="http://interactive.snm.org/index.cfm?PageID=4660">http://interactive.snm.org/index.cfm?PageID=4660</a>                         | SNMMI                   | N          | 20-40 US\$               | English  | Y         |
| online lecture                      | <a href="http://interactive.snm.org/index.cfm?PageID=4660">http://interactive.snm.org/index.cfm?PageID=4660</a>                         | SNMMI                   | N          | 20-40 US\$               | English  | Y         |
| LLSAP MOC                           | <a href="http://interactive.snm.org/index.cfm?PageID=3625">http://interactive.snm.org/index.cfm?PageID=3625</a>                         |                         | N          | 60-95 US\$               | English  | Y (MOC)   |
| webinar                             | <a href="http://www.eanm.org/elearning/webinars/esnm_philips.php?navI">http://www.eanm.org/elearning/webinars/esnm_philips.php?navI</a> | EANM (Philips)          | Y          |                          | English  | ?         |

|                             |                                                                                                                                                                           |      |   |  |         |   |
|-----------------------------|---------------------------------------------------------------------------------------------------------------------------------------------------------------------------|------|---|--|---------|---|
|                             | d=323&PHPSESSID=ml94dckk<br>t419mi737289upr7e5                                                                                                                            |      |   |  |         |   |
| online<br>lecture           | <a href="http://www.eanm.org/education_esnm/cme_cte/cme_2011/cme_session5.php?navId=83">http://www.eanm.org/education_esnm/cme_cte/cme_2011/cme_session5.php?navId=83</a> | EANM | Y |  | English | N |
| online<br>lecture           | <a href="http://www.eanm.org/education_esnm/cme_cte/cme_2011/cme_session5.php?navId=83">http://www.eanm.org/education_esnm/cme_cte/cme_2011/cme_session5.php?navId=83</a> | EANM | Y |  | English | N |
| online<br>lecture           | <a href="http://www.eanm.org/education_esnm/cme_cte/cme_2010/cme_session5.php?navId=83">http://www.eanm.org/education_esnm/cme_cte/cme_2010/cme_session5.php?navId=83</a> | EANM | Y |  | English | N |
| online<br>lecture           | <a href="http://www.eanm.org/education_esnm/cme_cte/cme_2009/cme_session7.php?navId=83">http://www.eanm.org/education_esnm/cme_cte/cme_2009/cme_session7.php?navId=83</a> | EANM | Y |  | English | N |
| online<br>lecture<br>(2007) | <a href="http://www.eanm.org/education_esnm/cme_cte/cte_2007/cte_session2.php?navId=93">http://www.eanm.org/education_esnm/cme_cte/cte_2007/cte_session2.php?navId=93</a> | EANM | Y |  | English | N |
| online<br>lecture<br>(2007) | <a href="http://www.eanm.org/education_esnm/cme_cte/cte_2007/cte_session2.php?navId=93">http://www.eanm.org/education_esnm/cme_cte/cte_2007/cte_session2.php?navId=93</a> | EANM | Y |  | English | N |



|                             |                                                                                                                                                                           |      |   |  |         |   |
|-----------------------------|---------------------------------------------------------------------------------------------------------------------------------------------------------------------------|------|---|--|---------|---|
| online<br>lecture<br>(2007) | <a href="http://www.eanm.org/education_esnm/cme_cte/cte_2007/cte_session2.php?navId=93">http://www.eanm.org/education_esnm/cme_cte/cte_2007/cte_session2.php?navId=93</a> | EANM | Y |  | English | N |
|-----------------------------|---------------------------------------------------------------------------------------------------------------------------------------------------------------------------|------|---|--|---------|---|
